# Supplementary material for: Liposomal clodronate selectively eliminates microglia from primary astrocyte cultures
Source: PubMed Central journal article supplement (PMC3419615; doi:10.1186/1742-2094-9-116), 2012-05-31
Supplement: 1742-2094-9-116-S1.pdf [file 1742-2094-9-116-S1.pdf]

# Additional file 1

| Gene symbol   | Accession number | Size | 5'- Forward primer -3'     | 5'- Reverse primer -3'   |
|---------------|------------------|------|----------------------------|--------------------------|
| <i>Gapdh</i>  | NM_008084.2      | 166  | gactcaacagcaactcccactct    | ggtttctactcctggaggccat   |
| <i>Nestin</i> | NM_016701.3      | 183  | gtcagctgagcctatagtcaacg    | agagtcactcatcattgtgctcc  |
| <i>Gfap</i>   | NM_001131020.1   | 185  | tgtactaacagagcgcgatc       | gggacttgctgctttaacattgg  |
| <i>Il6</i>    | NM_031168.1      | 169  | gctctcctaacagataagctggag   | ccacagtgaggaatgccacaac   |
| <i>Tnfa</i>   | NM_013693.2      | 153  | ttatggctcagggtccaactctgt   | tggacattgaggtccagtgat    |
| <i>Il1b</i>   | NM_008361.3      | 185  | gggctggactgttctaataatgcctt | ccatcagaggcaaggaggaaaaca |
| <i>Aif1</i>   | NM_019467        | 122  | caaagaacacaagaggccaactgg   | ttcatgctgctgtcatcagaagc  |
| <i>Cx3cr1</i> | NM_009987.3      | 155  | gacagacagactgagtcataatccc  | agccagtgtattaaccactgagc  |
| <i>Itgam</i>  | NM_001082960.1   | 214  | gtgaaaaatgagacgcccctacc    | cttgcctggtttctactgtcgc   |

**Additional file 1. Primer list**
