# Supplementary material for: Liposomal clodronate selectively eliminates microglia from primary astrocyte cultures
Source: PubMed Central journal article supplement (PMC3419615; doi:10.1186/1742-2094-9-116), 2012-05-31
Supplement: 1742-2094-9-116-S2.pdf [file 1742-2094-9-116-S2.pdf]

## Additional file 2

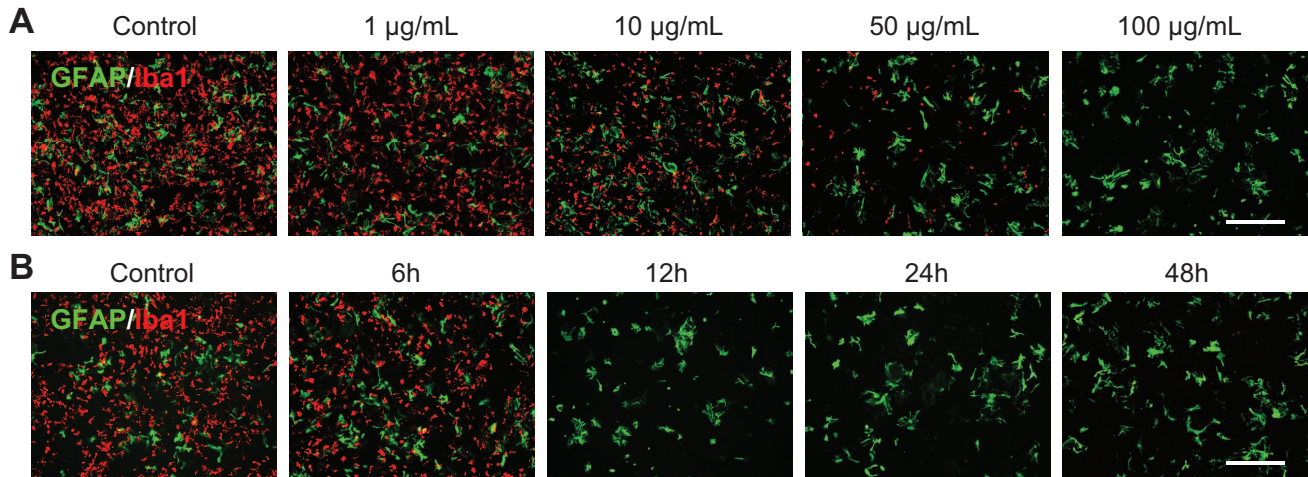

### **Additional file 2. Liposomal clodronate eliminates microglia from long-term cultured astrocytes.**

At 8 weeks after the preparation, primary astrocyte cultures were exposed with liposomal clodronate. (A-B) Double immunostaining using GFAP (green) and Iba1 (red) antibodies at 3 days after exposure to liposomal clodronate. (A) 100 µg/mL of liposomal clodronate completely eliminated microglia during 3 days of exposure. (B) 100 µg/mL concentration of liposomal clodronate completely eliminated microglia over 12 h of exposure duration. Scar bar, 500 µm.
